# Supplementary material for: Nano-Pulse Stimulation induces immunogenic cell death in human papillomavirus-transformed tumors and initiates an adaptive immune response
Source: PLoS One. 2018 Jan 11;13(1):e0191311. doi: 10.1371/journal.pone.0191311 (PMC5764415; doi:10.1371/journal.pone.0191311)
Supplement: S1 File — Tabs on spreadsheet include individual experiment data used to generate figures. (XLSX) [file pone.0191311.s001.xlsx]

## Sheet: Fig 2 Tumor Volume 
	Calculated Tumor Sizes (mm3)					Legend
							Euthanized, Tumor growth >1500 mm3
	Volume calculation		l*w*d				Euthanized, Ulcerating Tumor
							Euthanized for in vitro assays
							NPES 6/27/16, 7/18/16
			Days post challenge
	Group	Mouse Number	7	10	14	19	21	24	26	28	31	34	39	42	46	49						Day recorded dead
	Gp1 Tumor Only	2	1	4	24	300	300	390	840	840	624	784	1782									39
		7	1	2	28	108	272	425	425	450	612											34
		10	0.125	8	36	160	325	350	375	1024	1620											31
		14	0.125	1	45	120	192	330	330	539	972	1152	2484									39
		17	0	0.125	24	108	220	260	260	546	1080	1224	1620									39
		20	0	8	48	180	200	360	360	686	1296	1539										34
		22	0.125	1	54	240	540	540	540	735	952	1980										34
		24	0.125	8	64	192	48	200	275	576	588	832	1800									39
		25	0.125	8	90	300	320	425	425	798	840	1092	2750									39
		28	0.125	1	60	45	64	125	100	64	125	150	252	640	810	900						50	survived but was bearing tumor
	Gp 2 Tumor + NPES	1	1	8	0	0	0	0	0	0	1	64	27	0	0	0	0	0	0	0	0	50	survived
		4	1	8	0	0	0	0	0	0	0	0	0	0	0	0	0	0	0	0	0	50	survived
		5	1	8	0	0	0	0	0	0	0	0	0									39	*Skin Ulceration @ treatment site
		6	0.125	2	0	0	0	0	0	0	0	0	0	0	0	0	0	0	0	0	0	50	survived
		8	1	8	0	0	0	0	0	0	0	0	0	0	0	0	0	0	0	0	0	50	survived
		9	1	12	0	0	0	12	12	60	100	0	0	0	0	0	0	0	0	0	0	50	survived
		16	1	18	0	0	1	36	36	48	100	0	0	0	0	0	0	0	0	0	0	50	survived
		18	1	27	0	125	192	288	288	378	972	1485	1584									39	Tumor too large to treat with NPS
		19	1	27	0	0	0	0	0	1	8	8	0	0	0	0	0	0	0	0	0	50	survived
		21	1	12	0	0	0	8	12	27	27	64	1	0	0	0	0	0	0	0	0	50	survived
	Gp1 Tumor Only ELISpot mice	3	0.125	1	72	240	490	630	672	1360	1386	0	0	0	0	0	0	0	0	0	0
		13	0.125	1	30	132	260	400	400	952	1458	0	0	0	0	0	0	0	0	0	0
		15	0	1	28	220	390	588	672	1008	1215	0	0	0	0	0	0	0	0	0	0
		27	0.125	1	36	180	360	468	540	918	1360	0	0	0	0	0	0	0	0	0	0
		30	0	1	72	224	384	560	595	972	1600	0	0	0	0	0	0	0	0	0	0
	Gp 2 Tumor + NPES ELISpot mice	11	1	27	0	0	0	0	0	0	0	0	0	0	0	0	0	0	0	0	0
		12	1	27	0	0	0	0	0	0	0	0	0	0	0	0	0	0	0	0	0
		23	1	12	0	0	0	0	0	0	0	0	0	0	0	0	0	0	0	0	0
		26	0.125	18	0	0	0	0	0	0	0	0	0	0	0	0	0	0	0	0	0
		29	1	18	48	270	300	420	490	945	1600	0	0	0	0	0	0	0	0	0	0
										Gp1 Tumor Only

## Sheet: Fig 4 ELISPOT Data Summary
Data Summary for PBIO-002
	Spots per 1E6 cells	E7 Peptide (2.0 µg/mL)		Ampitope Pep (2.0 µg/mL)		Con A (1µg/mL)
	Mouse Number		Std Dev	Average	Std Dev	Average
No Tx	3	0	0	11	9.89949	546
	13	23	15.5563	13	4.24264	818
	15	32	2.82843	60	2.82843	140
	27	0	0	4	5.65685	551
	30	0	0	3	4.24264	160
NPES Tx	11	3	2.82843	8	4.24264	587
	12	14	2.82843	19	1.41421	660
	23	6	2.82843	17	1.41421	378
	26	0	0	6	8.48528	639
	29	0	0	2	2.82843	177
Positive Control	31	842	11.3137	36	2.82843	1630
	32	947	25.4558	0	0	110
	33	674	14.1421	0	0	368
	34	644	2.82843	0	0	271
	35	891	43.8406	0	0	199

## Sheet: Fig 4 ELISPOT Plate 1
PBIO-002 ELISPOT Plate Layout
Date	2016-07-20										ConA (1.0 µg/mL)
											E7 (49-57) Peptide (2.0 µg/mL)
											Ampitope peptide (2.0 µg/mL)
											Media
Plate 1																	Con A (1µg/mL)	E7 Peptide (2.0 µg/mL)		Ampitope Pep (2.0 µg/mL)					Con A (1µg/mL)	E7 Peptide (2.0 µg/mL)		Ampitope Pep (2.0 µg/mL)
	1	2	3	4	5	6	7	8	9	10	11	12			Per 5E5 cells	Mouse Number	Average	Average	Std Dev	Average	Std Dev		Per 1E6 cells	Mouse Number	Average	Average	Std Dev	Average	Std Dev
a	No Tx												5e5 per well		No Tx	3	273	0	0	5.5	4.94975		No Tx	3	546	0	0	11	9.89949
b		M3		M13		M15		M27		m30						13	409	11.5	7.77817	6.5	2.12132			13	818	23	15.5563	13	4.24264
c																15	70	16	1.41421	30	1.41421			15	140	32	2.82843	60	2.82843
d																27	275.5	0	0	2	2.82843			27	551	0	0	4	5.65685
e	NPES Tx												5e5 per well			30	80	0	0	1.5	2.12132			30	160	0	0	3	4.24264
f															NPES Tx	11	293.5	1.5	1.41421	4	2.12132		NPES Tx	11	587	3	2.82843	8	4.24264
g		M11		M12		M23		M26		M29						12	330	7	1.41421	9.5	0.707107			12	660	14	2.82843	19	1.41421
h																23	189	3	1.41421	8.5	0.707107			23	378	6	2.82843	17	1.41421
																26	319.5	0	0	3	4.24264			26	639	0	0	6	8.48528
																29	88.5	0	0	1	1.41421			29	177	0	0	2	2.82843
Raw Data
	1	2	3	4	5	6	7	8	9	10	11	12
A		347	289	440	408	119	97	317	288	166	58
B		34	34	21	32	55	53	18	18	26	16
C		54	47	23	20	67	69	31	25	30	35
D		49	41	18	12	39	37	29	25	30	34
E		4	6	18	16	10	8	6	6	25	24
F		6	9	20	19	15	14	6	15	25	27
G		4	3	12	8	5	7	9	9	29	21
H		267	327	357	323	188	202	330	327	107	120
Background Subtracted
	1	2	3	4	5	6	7	8	9	10	11	12
A		302	244	425	393	81	59	290	261	134	26
B		0	0	6	17	17	15	0	0	0	0
C		9	2	8	5	29	31	4	0	0	3
D
E		0.5	2.5	8	6	4	2	0	0	0	0
F		2.5	5.5	10	9	9	8	0	6	0	2
G
H		263.5	323.5	347	313	182	196	321	318	82	95

## Sheet: Fig 4 ELISPOT Plate 2
PBIO-002 ELISPOT Plate Layout
Date	2016-07-20										ConA (1.0 µg/mL)
											E7 (49-57) Peptide (2.0 µg/mL)
											Ampitope peptide (2.0 µg/mL)
											Media
Plate 2															Positive Control		Con A (1µg/mL)	E7 Peptide (2.0 µg/mL)		Ampitope Pep (2.0 µg/mL)			Spots per 1E6 cells	Con A (1µg/mL)	E7 Peptide (2.0 µg/mL)		Ampitope Pep (2.0 µg/mL)
	1	2	3	4	5	6	7	8	9	10	11	12			Number of Cells	Mouse Number	Average	Average	Std Dev	Average	Std Dev		Mouse Number	Average	Average	Std Dev	Average	Std Dev
a	Pos ctl												5e5 per well		5E5	31	146.5	398	18.3848	2	2.82843		31	293	796	36.7696	4	5.65685
b		M31		M32		M33		M34		M35					2.5E5	31	407.5	210.5	2.82843	9	0.707107		31	1630	842	11.3137	36	2.82843
c															5E5	32	55	473.5	12.7279	0	0		32	110	947	25.4558	0	0
d															2.5E5	32	428	235.5	22.6274	1	1.41421		32	1712	942	90.5097	4	5.65685
e	Pos ctl												2.5e5 per well		5E5	33	184	337	7.07107	0	0		33	368	674	14.1421	0	0
f															2.5E5	33	426.5	124.5	1.41421	1	0.707107		33	1706	498	5.65685	4	2.82843
g		M31		M32		M33		M34		M35					5E5	34	135.5	322	1.41421	0	0		34	271	644	2.82843	0	0
h															2.5E5	34	450	131	7.77817	0	0		34	1800	524	31.1127	0	0
															5E5	35	99.5	445.5	21.9203	0	0		35	199	891	43.8406	0	0
Raw Data															2.5E5	35	473	254	15.5563	1	1.41421		35	1892	1016	62.2254	4	5.65685
	1	2	3	4	5	6	7	8	9	10	11	12
A		144	157	84	43	181	199	113	170	86	137
B		415	389	491	473	348	338	329	327	442	473
C		3	8	17	18	3	4	8	3	10	8
D		2	6	4	13	3	9	5	7	11	13
E		209	213	224	256	129	127	140	129	268	246
F		2	1	4	3	3	1	1	2	1	5
G		0	1	5	4	3	4	4	3	3	3
H		418	398	461	404	425	435	459	448	458	494
Background Subtracted
	1	2	3	4	5	6	7	8	9	10	11	12
A		140	153	75.5	34.5	175	193	107	164	74	125
B		411	385	482.5	464.5	342	332	323	321	430	461
C		0	4	8.5	9.5	0	0	2	0	0	0
D
E		208.5	212.5	219.5	251.5	125.5	123.5	136.5	125.5	265	243
F		1.5	0.5	0	0	0	0	0	0	0	2
G
H		417.5	397.5	456.5	399.5	421.5	431.5	455.5	444.5	455	491

## Sheet: Fig 5 6 Tumor Volume Primary
	Calculated Tumor Sizes (mm3)					Legend
							Euthanized, Tumor growth >1500 mm3
	Volume calculation		l*w*d				Euthanized, Ulcerating Tumor
							Euthanized for in vitro assays
			Days post challenge
	Group	Mouse Number	10	15	18	21	25	29	32	35	39	43	46	49	52
	1 Tumor only ELISpot	1	72	275	468	588	896	1224	0	0	0	0	0	0	0	0
		2	45	175	252	504	864	770	0	0	0	0	0	0	0	0
		3	12	45	176	330	385	504	0	0	0	0	0	0	0	0
		4	45	176	220	540	576	576	0	0	0	0	0	0	0	0
		45	16	108	144	396	504	1071	0	0	0	0	0	0	0	0
	2 NPES ELISpot	6	80	0	0	0	0	0	0	0	0	0	0	0	0	0
		7	72	0	0	0	0	0	0	0	0	0	0	0	0	0
		8	72	8	64	210	490	768	0	0	0	0	0	0	0	0
		9	24	0	0	0	0	0	0	0	0	0	0	0	0	0
		10	36	0	0	0	0	0	0	0	0	0	0	0	0	0
	3 NPES Re-challenge	11	60	8	36	140	378	704	960	1170	0	0	0	0	0	0
		12	60	0	0	0	0	0	0	0	0	0	0	0	0	0
		13	48	0	0	0	0	0	0	0	0	0	0	0	0	0
		14	36	0	0	0	0	0	0	0	0	0	0	0	0	0
		15	27	0	0	0	0	0	0	0	0	0	0	0	0	0
		16	48	0	0	0	0	0	0	0	0	0	0	0	0	0
		17	16	0	0	0	0	0	0	0	0	0	0	0	0	0
		18	72	0	0	0	0	0	0	0	0	0	0	0	0	0
		19	75	108	0	0	0	27	64	125	175	200
		20	72	0	0	0	0	0	0	0	0	0	0	0	0	0
		21	12	0	0	175	324	704	704	1040	1950
	4 NPES CD4 Depletion	23	36	0	0	0	0	0	0	0	0	0	0	0	0	0
		24	60	0	0	0	0	0	0	0	0	0	0	0	0	0
		25	36	0	0	0	0	0	0	0	0	0	0	0	0	0
		26	18	0	0	0	0	0	0	0	0	0	0	0	0	0
		27	64	8	8	108	216	168	288	432	648	693
		28	64	0	0	0	0	0	0	0	0	0	0	0	0	0
		29	36	96	288	420	1100	2160
		30	60	0	0	0	0	0	0	0	0	0	0	0	0	0
		31	48	0	0	0	0	0	0	0	0	0	0	0	0	0
		32	80	0	0	0	0	0	0	0	0	0	0	0	0	0
	5 NPES CD8 Depletion	35	60	0	0	0	0	0	0	0	0	0	0	0	0	0
		36	75	0	0	0	0	0	0	0	0	0	0	0	0	0
		37	36	0	0	0	0	0	0	0	36	80	294	294			2nd tumor
		38	36	0	0	0	0	0	0	0.125	0	0	0	0	0	0
		39	27	0	0	0	0	0	0	0	0	0	0	0	0	0
		40	45	0	0	0	0	0	0	0	0	0	0	0	0	0
		41	60	0	0	0	0	0	0	0	0	0	0	0	0	0
		42	48	0	0	0	8	27	125	216	288	336	504	1100
		43	48	0	0	0	0	0	0	0	0	0	0	0	0	0
		44	80	0	0	0	0	0	0	0	0	0	0	0	0	0
	6 Challenge Naïve mice	47	0	0	0	0	0	0	0	0	0	0	0	0	0	0
		48	0	0	0	0	0	0	0	0	0	0	0	0	0	0
		49	0	0	0	0	0	0	0	0	0	0	0	0	0	0
		50	0	0	0	0	0	0	0	0	0	0	0	0	0	0
		51	0	0	0	0	0	0	0	0	0	0	0	0	0	0
		52	0	0	0	0	0	0	0	0	0	0	0	0	0	0
		53	0	0	0	0	0	0	0	0	0	0	0	0	0	0
		54	0	0	0	0	0	0	0	0	0	0	0	0	0	0
		55	0	0	0	0	0	0	0	0	0	0	0	0	0	0
		56	0	0	0	0	0	0	0	0	0	0	0	0	0	0

## Sheet: Fig 5 6Tumor Volume Rechallenge
	Calculated Tumor Sizes (mm3)
	Volume calculation		l*w*d
			Days post challenge
			39	43	46	50		53		57		60	64		70	71	74		77	84	Days post primary challenge
	Group	Mouse Number	8	12	15	19	21	22	25	26	28	29	33	35	36	37	40	42	43	50	Days post rechallenge
	3 NPES Re-challenge		0	0	0	0	0	0	0	0	0	0	0	0		0	0	0	0	0		Not rechallenged
		12	0.125	8	125	768		792	0	1215	1350										28
		13	0	0	0	0		0	0	0	0	0	0	0		0	0	0	0	0	50	alive
		14	0	8	45	140		140	0	378	0	528	672								33
		15	0.125	1	64	270		288	0	768	832	672	1134								33
		16	1	64	45	60		45	0	120	140	140	140	200		270	360	672	672	<<1500	50	alive
		17	60	64	210	270		336	0	792	960	672	1260								33
		18	0	0	0	0		0	0	0	0	0	0	0		0	0	0	0	0	50	alive
		19																			12	Primary Tumor Ulceration, not used in survival
		20	0.125	1	1	0		0	0	0	0	27	90	210		280	378				40
			0	0	0	0		0	0	0	0	0	0	0		0	0	0	0	0		Not rechallenged
	4 NPES CD4 Depletion	23	1	30	30	3		0	0	0	0	0	0	0		0	0	0	0	0	50	alive
		24	6	16	16	0		0	0	0	0	0	0	0		0	0	0	0	0	50	alive
		25	2	24	20	1		0	0	0	0	1	27	100		100	120	224	224	<<1500	50	alive
		26	1	30	275	275		168	0	60	0	180	330	576		1008	1224				40
																						Not rechallenged
		28	0	0.125	1	64		36	0	324	0	640	720	880		1540	1760				40
																						Not rechallenged
		30	8	72	45	20		45	0	96	0	200	288	441		792	1170				40
		31	0	0	0	0		0	0	0	0	0	0	0		0	0	0	0	0	50	alive
		32	0.125	27	40	175		180	0	448	0	441	704	1188	1296						36
	5 NPES CD8 Depletion	35	0.125	27	175	210		343	0	880	880	1188	1188								33
		36	0	1	64	210		672	0	936	1425										28
		37	1	45	160	385	864														21
		38	0	16	180	560	756														21
		39	0.75	36	250	504		686	1377												25
		40	0	72	300	490		960	1152												25
		41	1	96	300	420		832	0	1350	1500										28
		42	0.125	8	36	252	360														21	Primary tumor too large
		43	1	100	210	336		640	1200												25
		44	0.125	96	200	462		768	1260												25
	6 Naïve	47	0.125	32	200	270		336	not measured												25	*Ulceration made measurements not possible on D25
		48	36	81	176	637		504	1053												25
		49	1	36	168	210		210		150		280	378	539		840	1144				40
		50	0	16	200	175		72		180		330	360	490		768	816				40
		51	0.125	28	200	637		364	832												25
		52	1	64	175	216		150		175		240	240	324		432	720				40
		53	0	0.125	0.125	8		64		150		360	396	576		980	1344				40
		54	0.125	80	175	252		294		240		378	420	462		972	1232				40
		55	1	24	220	396															19
		56	0	16	325	432		637	1134												25
